# Supplementary material for: Exploring the implications of the new ICD-10-CM classification system for injury surveillance: analysis of dually coded data from two medical centres
Source: PubMed Central journal article supplement — Inj Prev. 2021 Mar 4;27(Suppl 1):i19–26. doi: 10.1136/injuryprev-2019-043519 (PMC7948193; doi:10.1136/injuryprev-2019-043519), 2021-03-04
Supplement: injuryprev-2019-043519supp001.pdf [file injuryprev-2019-043519supp001.pdf]

| Mechanism/Cause ICD-10-CM |                              | Mechanism/Cause ICD-9-CM |          |      |           |         |           |     |                     |                  |                 |                       |              |           |                   |             |                 |               | Total |
|---------------------------|------------------------------|--------------------------|----------|------|-----------|---------|-----------|-----|---------------------|------------------|-----------------|-----------------------|--------------|-----------|-------------------|-------------|-----------------|---------------|-------|
|                           |                              | Cut/pierce               | Drowning | Fall | Fire/burn | Firearm | Machinery | MVT | Other pedal cyclist | Other pedestrian | Other transport | Natural/environmental | Overexertion | Poisoning | Struck by/against | Suffocation | Other specified | Not specified |       |
| Cut/pierce                |                              | 21                       | 0        | 0    | 0         | 0       | 0         | 0   | 0                   | 0                | 0               | 0                     | 0            | 1         | 0                 | 0           | 0               | 0             | 22    |
| Drowning/submersion       |                              | 0                        | 7        | 0    | 0         | 0       | 0         | 0   | 0                   | 0                | 0               | 0                     | 0            | 0         | 0                 | 0           | 0               | 0             | 7     |
| Fall                      |                              | 0                        | 0        | 178  | 0         | 0       | 0         | 1   | 1                   | 0                | 0               | 0                     | 0            | 1         | 1                 | 0           | 0               | 0             | 182   |
| Fire/flare                |                              | 0                        | 0        | 0    | 12        | 0       | 0         | 1   | 0                   | 0                | 0               | 0                     | 0            | 0         | 0                 | 0           | 0               | 0             | 13    |
| Hot object/substance      |                              | 0                        | 0        | 0    | 12        | 0       | 0         | 0   | 0                   | 0                | 0               | 0                     | 0            | 0         | 0                 | 0           | 0               | 0             | 12    |
| Firearm                   |                              | 0                        | 0        | 0    | 0         | 20      | 0         | 0   | 0                   | 0                | 0               | 0                     | 0            | 0         | 0                 | 0           | 0               | 0             | 20    |
| Machinery                 |                              | 0                        | 0        | 1    | 0         | 0       | 2         | 0   | 0                   | 0                | 0               | 0                     | 0            | 0         | 0                 | 0           | 0               | 0             | 3     |
| MVT                       | Occupant                     | 0                        | 0        | 0    | 0         | 0       | 0         | 85  | 0                   | 0                | 1               | 0                     | 0            | 0         | 0                 | 0           | 0               | 0             | 86    |
|                           | Motor cyclist                | 0                        | 0        | 0    | 0         | 0       | 0         | 17  | 0                   | 0                | 0               | 0                     | 0            | 0         | 0                 | 0           | 0               | 0             | 17    |
|                           | Pedal cyclist                | 0                        | 0        | 0    | 0         | 0       | 0         | 12  | 3                   | 0                | 0               | 0                     | 0            | 0         | 0                 | 0           | 0               | 0             | 15    |
|                           | Pedestrian                   | 0                        | 0        | 0    | 0         | 0       | 0         | 17  | 0                   | 0                | 0               | 0                     | 0            | 0         | 0                 | 0           | 0               | 0             | 17    |
| Other pedal cyclist       |                              | 0                        | 0        | 0    | 0         | 0       | 0         | 2   | 28                  | 0                | 0               | 0                     | 0            | 0         | 0                 | 0           | 0               | 0             | 30    |
| Other pedestrian          |                              | 0                        | 0        | 0    | 0         | 0       | 0         | 3   | 0                   | 4                | 0               | 0                     | 0            | 0         | 0                 | 0           | 0               | 0             | 7     |
| MV nontraffic             |                              | 0                        | 0        | 0    | 0         | 0       | 0         | 21  | 0                   | 0                | 3               | 0                     | 0            | 0         | 0                 | 0           | 0               | 0             | 24    |
| Other land transport      |                              | 0                        | 0        | 0    | 0         | 0       | 0         | 0   | 0                   | 0                | 15              | 0                     | 0            | 0         | 0                 | 0           | 0               | 0             | 15    |
| Other transport           |                              | 0                        | 0        | 0    | 0         | 0       | 0         | 0   | 0                   | 0                | 4               | 0                     | 0            | 0         | 0                 | 0           | 1               | 0             | 5     |
| Natural/environmental     | Bites & stings, non-venomous | 0                        | 0        | 0    | 0         | 0       | 0         | 0   | 0                   | 0                | 0               | 5                     | 0            | 0         | 0                 | 0           | 0               | 0             | 5     |
|                           | Bites & stings, venomous     | 0                        | 0        | 0    | 0         | 0       | 0         | 0   | 0                   | 0                | 0               | 1                     | 0            | 0         | 0                 | 0           | 0               | 0             | 1     |
|                           | Other                        | 0                        | 0        | 0    | 0         | 0       | 0         | 0   | 0                   | 0                | 0               | 2                     | 0            | 0         | 0                 | 0           | 0               | 0             | 2     |
| Overexertion              |                              | 0                        | 0        | 5    | 0         | 0       | 0         | 0   | 0                   | 0                | 1               | 0                     | 1            | 0         | 0                 | 0           | 0               | 0             | 6     |
| Poisoning                 | Drug                         | 1                        | 0        | 0    | 0         | 0       | 0         | 0   | 0                   | 0                | 0               | 0                     | 0            | 48        | 0                 | 0           | 1               | 0             | 49    |
|                           | Non-drug                     | 0                        | 0        | 0    | 0         | 0       | 0         | 0   | 0                   | 0                | 0               | 0                     | 0            | 2         | 0                 | 0           | 0               | 0             | 2     |
| Struck by/against         |                              | 1                        | 0        | 9    | 0         | 0       | 0         | 0   | 0                   | 0                | 0               | 0                     | 0            | 0         | 48                | 0           | 0               | 0             | 58    |
| Suffocation               |                              | 0                        | 0        | 0    | 0         | 0       | 0         | 0   | 0                   | 0                | 0               | 0                     | 0            | 0         | 0                 | 3           | 0               | 0             | 3     |
| Other specified           | Foreign body                 | 0                        | 0        | 0    | 0         | 0       | 0         | 0   | 0                   | 0                | 0               | 0                     | 0            | 0         | 0                 | 0           | 3               | 0             | 3     |
|                           | Classifiable                 | 0                        | 0        | 1    | 1         | 0       | 0         | 0   | 0                   | 0                | 0               | 0                     | 0            | 0         | 0                 | 0           | 11              | 0             | 13    |
|                           | NEC                          | 0                        | 0        | 0    | 0         | 0       | 0         | 0   | 0                   | 0                | 0               | 0                     | 0            | 0         | 0                 | 0           | 1               | 2             | 3     |
|                           | Child/adult abuse            | 0                        | 0        | 0    | 0         | 0       | 0         | 0   | 0                   | 0                | 0               | 0                     | 0            | 0         | 0                 | 0           | 2               | 0             | 2     |
| Unspecified               |                              | 1                        | 0        | 0    | 0         | 0       | 0         | 0   | 0                   | 0                | 0               | 0                     | 3            | 0         | 0                 | 0           | 4               | 2             | 10    |
| <b>Total</b>              |                              | 24                       | 7        | 194  | 25        | 20      | 2         | 159 | 32                  | 4                | 23              | 8                     | 4            | 52        | 49                | 3           | 22              | 4             | 632   |

Shaded cells indicate agreement on category assignment between ICD-9-CM and ICD-10-CM external cause matrices

**Table S1.** Medical Center A: Assignment of ICD-9-CM and ICD-10-CM codes for 632 dually coded injury records to specific mechanism/cause categories by external cause of injury matrices

| Mechanism/Cause ICD-10-CM |                           | Mechanism/Cause ICD-9-CM |       |           |         |           |     |                     |                  |                 |                       |              |           |                   |             |     |                 |               |       |
|---------------------------|---------------------------|--------------------------|-------|-----------|---------|-----------|-----|---------------------|------------------|-----------------|-----------------------|--------------|-----------|-------------------|-------------|-----|-----------------|---------------|-------|
|                           |                           | Cut/pierce               | Falls | Fire/burn | Firearm | Machinery | MVT | Other pedal cyclist | Other pedestrian | Other transport | Natural/environmental | Overexertion | Poisoning | Struck by/against | Suffocation | NEC | Other specified | Not specified | Total |
| Cut/pierce                |                           | 12                       | 0     | 0         | 0       | 0         | 0   | 0                   | 0                | 0               | 0                     | 1            | 0         | 0                 | 0           | 0   | 1               | 0             | 14    |
| Fall                      |                           | 0                        | 157   | 0         | 0       | 1         | 0   | 0                   | 0                | 1               | 0                     | 1            | 0         | 1                 | 0           | 0   | 0               | 0             | 161   |
| Fire/flare                |                           | 0                        | 0     | 15        | 0       | 0         | 0   | 0                   | 0                | 0               | 0                     | 0            | 0         | 0                 | 0           | 0   | 0               | 0             | 15    |
| Hot object/substance      |                           | 0                        | 0     | 19        | 0       | 0         | 0   | 0                   | 0                | 0               | 0                     | 0            | 0         | 0                 | 0           | 0   | 0               | 0             | 19    |
| Firearm                   |                           | 0                        | 0     | 0         | 2       | 0         | 0   | 0                   | 0                | 0               | 0                     | 0            | 0         | 0                 | 0           | 0   | 0               | 0             | 2     |
| Machinery                 |                           | 1                        | 1     | 0         | 0       | 11        | 0   | 0                   | 0                | 0               | 0                     | 0            | 0         | 0                 | 0           | 0   | 0               | 0             | 13    |
| MVT                       | Occupant                  | 0                        | 0     | 0         | 0       | 0         | 80  | 0                   | 0                | 0               | 0                     | 0            | 0         | 0                 | 0           | 0   | 0               | 0             | 80    |
|                           | Motor cyclist             | 0                        | 0     | 0         | 0       | 0         | 52  | 0                   | 0                | 0               | 0                     | 0            | 0         | 0                 | 0           | 0   | 0               | 0             | 52    |
|                           | Pedal cyclist             | 0                        | 0     | 0         | 0       | 0         | 4   | 6                   | 0                | 0               | 0                     | 0            | 0         | 0                 | 0           | 0   | 0               | 0             | 10    |
|                           | Pedestrian                | 0                        | 0     | 0         | 0       | 0         | 5   | 0                   | 0                | 0               | 0                     | 0            | 0         | 0                 | 0           | 0   | 0               | 0             | 5     |
|                           | Unspecified               | 0                        | 0     | 0         | 0       | 0         | 0   | 0                   | 0                | 0               | 0                     | 0            | 0         | 0                 | 0           | 0   | 0               | 0             | 0     |
| Other pedal cyclist       |                           | 0                        | 0     | 0         | 0       | 0         | 0   | 12                  | 0                | 0               | 0                     | 0            | 0         | 0                 | 0           | 0   | 0               | 0             | 12    |
| Other pedestrian          |                           | 0                        | 0     | 0         | 0       | 0         | 0   | 0                   | 1                | 2               | 0                     | 0            | 0         | 0                 | 0           | 0   | 0               | 0             | 3     |
| MV nontraffic             |                           | 0                        | 0     | 0         | 0       | 2         | 2   | 0                   | 0                | 3               | 0                     | 0            | 0         | 0                 | 0           | 0   | 0               | 0             | 7     |
| Other land transport      |                           | 0                        | 0     | 0         | 0       | 0         | 0   | 0                   | 0                | 18              | 0                     | 0            | 0         | 0                 | 0           | 0   | 0               | 0             | 18    |
| Other transport           |                           | 0                        | 0     | 0         | 0       | 0         | 0   | 0                   | 0                | 3               | 0                     | 0            | 0         | 0                 | 0           | 0   | 0               | 1             | 4     |
| Natural/environmental     | Bite & sting, nonvenomous | 0                        | 0     | 0         | 0       | 0         | 0   | 0                   | 0                | 0               | 1                     | 0            | 0         | 0                 | 0           | 0   | 0               | 0             | 1     |
|                           | Other                     | 0                        | 0     | 0         | 0       | 0         | 0   | 0                   | 0                | 0               | 3                     | 0            | 0         | 0                 | 1           | 0   | 0               | 0             | 4     |
| Overexertion              |                           | 0                        | 1     | 0         | 0       | 0         | 0   | 0                   | 0                | 0               | 0                     | 0            | 0         | 0                 | 0           | 0   | 0               | 0             | 1     |
| Poisoning                 | Drug                      | 0                        | 0     | 0         | 0       | 0         | 0   | 0                   | 0                | 0               | 0                     | 37           | 0         | 0                 | 0           | 0   | 0               | 0             | 37    |
|                           | Non-drug                  | 0                        | 0     | 0         | 0       | 0         | 0   | 0                   | 0                | 0               | 0                     | 1            | 0         | 0                 | 0           | 0   | 0               | 0             | 1     |
| Struck by/against         |                           | 0                        | 1     | 0         | 0       | 0         | 0   | 0                   | 0                | 0               | 0                     | 0            | 31        | 0                 | 0           | 0   | 0               | 1             | 33    |
| Other specified           | Foreign body              | 0                        | 0     | 0         | 0       | 0         | 0   | 0                   | 0                | 0               | 0                     | 0            | 0         | 1                 | 0           | 3   | 0               | 4             |       |
|                           | Classifiable              | 0                        | 0     | 0         | 0       | 0         | 0   | 0                   | 0                | 0               | 0                     | 0            | 0         | 0                 | 2           | 9   | 0               | 11            |       |
|                           | NEC                       | 0                        | 0     | 0         | 0       | 0         | 0   | 0                   | 0                | 0               | 0                     | 0            | 1         | 0                 | 1           | 0   | 0               | 2             |       |
|                           | Child/adult abuse         | 0                        | 0     | 0         | 0       | 0         | 0   | 0                   | 0                | 0               | 1                     | 0            | 0         | 0                 | 0           | 0   | 1               | 2             |       |
| Unspecified               |                           | 0                        | 0     | 0         | 0       | 0         | 0   | 0                   | 0                | 0               | 0                     | 0            | 0         | 0                 | 2           | 1   | 6               | 9             |       |
| <b>Total</b>              |                           | 13                       | 160   | 34        | 2       | 14        | 143 | 18                  | 1                | 27              | 5                     | 1            | 39        | 33                | 2           | 5   | 14              | 9             | 520   |

Shaded cells indicate agreement on category assignment between ICD-9-CM and ICD-10-CM external cause matrices

**Table S2.** Medical Center B: Assignment of ICD-9-CM and ICD-10-CM codes for 520 dually coded injury records to specific mechanism/cause categories by external cause of injury matrices
